# Supplementary material
Source: publisher site journal article supplement (https://www.spandidos-publications.com/1333/downloadSupplementary)
Supplement: Supplementary file 1 [file downloadSupplementary]

## Sheet: Sheet1
Symbol	AS ID	Splice type	Exons	From exon	To exon	Novel splice	Percent with values	PSI range	SD PSI
AGTRAP	670	AA	4.1	3	4.2	0	0.95	1	0.1492
SCMH1	2054	ES	06:08:00	5	9	0	0.9357	1	0.1612
DMAP1	2547	RI	1.2	1.1	1.3	0	0.981	0.5899	0.1088
RNF220	2559	AD	9.2	9.1	10.1	0	0.981	0.4697	0.078
DEPDC1	3369	ES	8	7	9	0	0.9738	0.8008	0.1321
USP33	3533	AA	15.1	14	15.2	0	0.9714	0.7571	0.1071
HS2ST1	3691	AT	8	null	null	0	0.981	0.4579	0.0827
ADAMTSL4	7486	AT	16.2	null	null	0	0.981	0.3604	0.054
ADAMTSL4	7487	AT	20	null	null	0	0.981	0.3604	0.054
ARNT	7513	ES	7	6	8	0	0.9738	0.7021	0.1228
UBAP2L	7814	AT	29	null	null	0	0.981	0.5066	0.0915
IGSF9	8424	AA	9.1	8	9.2	0	0.9786	0.3645	0.0507
ANGEL2	9775	AP	1	null	null	0	0.981	0.7779	0.1366
ANGEL2	9776	AP	2	null	null	0	0.981	0.7779	0.1366
WAC	11105	ES	9	8	10	0	0.981	0.3403	0.0559
RPS24	12296	ES	5.2	4	6	0	0.981	0.8031	0.1481
PCGF5	12509	AT	4	null	null	0	0.981	0.7729	0.1463
PCGF5	12510	AT	12	null	null	0	0.981	0.7729	0.1463
BTAF1	12524	ES	00:25:26.100000	24	26.2	0	0.8143	0.5729	0.0927
HPS1	12760	AT	10.2	null	null	0	0.981	0.4778	0.0638
HPS1	12761	AT	20	null	null	0	0.981	0.4778	0.0638
POLL	12903	ES	1.2:1.5	1.1	3	0	0.8286	0.8926	0.214
AP2A2	13822	AA	8.1	7	8.2	0	0.981	0.5226	0.055
SERGEF	14558	ES	12	11	14	0	0.981	0.6071	0.101
HPS5	14593	ES	1.3:2	1.2	3	0	0.781	1	0.1188
NR1H3	15709	ES	3.5	1	5.2	0	0.7714	0.7073	0.1281
MADD	15713	AP	1	null	null	0	0.8476	0.8334	0.1476
FAM111A	16027	AA	3.1:3.2	2	3.3	0	0.9643	0.907	0.2237
TMEM25	19023	AA	2.2	1	2.3	0	0.9143	0.605	0.0928
TMEM218	19283	ES	02:03:00	1.2	4.2	0	0.9786	0.5113	0.0554
RAD52	19643	ES	9	8	10	0	0.9024	1	0.1752
LETMD1	21767	ES	2:3.2:3.3:4:5:6	1.2	7	0	0.919	1	0.2279
TMEM116	24566	ES	3	2	4	0	0.9619	0.7566	0.1251
CAMKK2	24845	AP	1	null	null	0	0.9381	0.4001	0.0525
EP400NL	25240	AP	2.1	null	null	0	0.9738	0.9544	0.1203
ZNF605	25320	ES	2	1	3	0	0.8405	1	0.1956
UGGT2	26132	ES	9	7	10	0	0.969	0.3348	0.0549
TMTC4	26199	ES	2	1	3	0	0.9738	0.8011	0.1209
NPAS3	27146	AA	6.1	4.2	6.2	0	0.831	0.6758	0.089
KIAA0391	27213	AP	2.1	null	null	0	0.9762	0.7944	0.129
KIAA0391	27214	AP	1	null	null	0	0.9762	0.7944	0.129
TRAPPC6B	27360	ES	4	3	5	0	0.969	0.5504	0.0864
JDP2	28500	AP	2	null	null	0	0.981	0.5847	0.1023
JDP2	28503	AP	4	null	null	0	0.981	0.545	0.1014
SERPINA1	29121	AA	2.4	1.1	2.5	0	0.7738	0.8449	0.1242
MOK	29384	ES	9	8	10.2	0	0.8071	0.7629	0.1376
RAB40C	32914	RI	3.2	3.1	3.3	0	0.9476	0.9599	0.1469
C16orf13	32922	ES	3	1	5	0	0.981	0.7821	0.1523
RNPS1	33256	AD	2.2:2.3	2.1	3	0	0.9548	0.6476	0.1121
UBALD1	33770	AA	2.3:2.4	1.2	2.5	0	0.9333	0.8702	0.1223
UBALD1	33772	ES	1.3:2.3	1.2	2.5	0	0.9214	0.5338	0.1103
CLEC16A	34006	AD	11.2	11.1	12	0	0.9452	1	0.1667
RBBP6	35644	ES	16	15	17	0	0.9357	0.8375	0.1329
GPR56	36580	AA	16.1	15	16.2	0	0.981	0.4251	0.0742
KIFC3	36608	ES	28	27	29	0	0.9714	0.3556	0.0556
NUDT7	37669	ES	2	1	5	0	0.8429	0.3254	0.0593
SLC43A2	38344	AP	2	null	null	0	0.95	0.5686	0.098
TNK1	38931	AA	4.1	3	4.2	0	0.8452	0.4641	0.0775
LGALS9	39856	ES	05:06:00	4	7	0	0.981	0.5647	0.0706
TADA2A	40522	AD	6.2	6.1	7	0	0.9452	0.3767	0.055
PCGF2	40582	AP	2.1	null	null	0	0.9762	0.8501	0.1538
SPAG9	42494	ES	30	29	31	0	0.95	0.9633	0.1824
LLGL2	43463	ES	26	25	27	0	0.981	0.5035	0.0826
METTL23	43627	RI	4.3	4.2	4.4	0	0.9762	0.6404	0.115
GAA	44021	ES	2.2	1	3	1	0.9143	0.8618	0.1222
CLUL1	44450	AP	2	null	null	0	0.8929	1	0.1695
EPB41L3	44533	ES	25	24	26	0	0.8881	0.5487	0.0773
DNMT1	47475	ES	5	4.2	6	0	0.9786	0.6271	0.0888
CDKN2D	47553	RI	1.2	1.1	1.3	0	0.9738	0.7473	0.1365
DHPS	47831	AA	9.1	7	9.2	0	0.9714	0.4052	0.056
SMIM7	48190	AD	7.2	7.1	9.1	0	0.9714	0.9635	0.1304
USHBP1	48249	AA	3.1:3.2	2	3.3	0	0.85	0.6708	0.1071
ZNF540	49541	AP	2	null	null	0	0.7571	1	0.2756
ZNF540	49542	AP	1	null	null	0	0.7571	1	0.2756
ARHGEF1	50098	AP	1	null	null	0	0.9762	0.7992	0.1571
ARHGEF1	50099	AP	2	null	null	0	0.9762	0.7992	0.1571
ZNF667	52180	ES	00:02:03.200000	1	6	0	0.8667	1	0.2183
ZNF586	52341	ES	3	1	4	0	0.8333	0.6025	0.1167
ZNF544	52425	AT	10.2	null	null	0	0.981	0.7723	0.1272
ZNF544	52426	AT	12	null	null	0	0.981	0.7742	0.1298
SH3YL1	52494	AP	2	null	null	0	0.981	0.5132	0.0836
PLB1	53066	ES	1 day, 18:43:44	41	45	0	0.8357	0.86	0.172
LTBP1	53185	AA	12.1	11	12.2	0	0.9024	0.7794	0.1362
C1D	53822	ES	2.2	1.1	3.1	0	0.981	0.8499	0.1258
ANKRD36	54594	AT	76	null	null	0	0.9786	0.8163	0.1413
ANKRD36	54595	AT	77	null	null	0	0.9786	0.8163	0.1498
UNC50	54643	RI	1.2:1.3	1.1	1.4	1	0.8595	0.8723	0.1975
SMPD4	55300	ES	11	10	14	0	0.981	0.7613	0.1248
NDUFB3	56780	AA	2.1	1	2.2	0	0.9571	0.5872	0.1057
SUMO1	56939	ES	03:04:00	1	5.1	0	0.9452	0.7419	0.1099
FAM110A	58466	AP	4.1	null	null	0	0.9762	0.4453	0.0754
FAM110A	58467	AP	1	null	null	0	0.9762	0.4453	0.0804
ID1	58896	RI	1.2	1.1	1.3	0	0.981	0.3731	0.0728
DNMT3B	58964	ES	23	22	24	0	0.9071	0.4337	0.0543
SLC19A1	60883	AA	8.1	7	8.2	0	0.981	0.3987	0.0639
GCAT	62160	AA	2.1	1	2.2	0	0.9786	0.6308	0.134
MAPK12	62807	AP	1	null	null	0	0.7857	0.7116	0.148
MAPK12	62808	AP	2.1	null	null	0	0.7857	0.7116	0.148
SETMAR	62996	AA	2.1:2.2	1	2.3	0	0.981	0.9331	0.1521
RPL15	63732	AD	1.3	1.2	3.2	0	0.981	0.3831	0.0625
SLC4A7	63780	ES	26	25	27	0	0.8619	0.54	0.0965
KRBOX1	64325	AT	10	null	null	0	0.9476	1	0.2488
KRBOX1	64326	AT	8	null	null	0	0.9476	1	0.2488
IP6K2	64765	ES	8.2:11.1	8.1	11.2	0	0.7643	1	0.1825
RHOA	64857	ES	03:04:05	2	6	1	0.981	0.537	0.0696
RBM6	64950	ES	04:05:06	2	7	0	0.9214	0.8671	0.1537
RBM6	64952	ES	3.2:4:5	2	7	0	0.9643	1	0.1775
RBM6	64953	ES	04:05:00	2	7	0	0.8262	0.6264	0.1102
PCBP4	65137	ES	3	2.2	5	0	0.9714	0.4341	0.0847
CEP70	67003	ES	3.3:4:5:6	2	7.1	0	0.7643	0.8942	0.2106
ACPL2	67063	ES	6	5	9	0	0.9452	0.7474	0.1101
PACRGL	68892	ES	6:7:8:9:12	5	13.1	0	0.9286	0.4848	0.089
RBM47	69086	AP	1	null	null	0	0.981	0.5972	0.0787
FAM175A	69801	ES	7	6	8	0	0.9429	0.4529	0.0511
UBE2D3	70117	AP	3.1	null	null	0	0.981	0.4964	0.0982
SLC10A7	70775	ES	13	12	14	0	0.8214	0.8618	0.1912
TTC23L	71732	RI	7.2	7.1	7.3	0	0.8167	0.9393	0.2818
PDE4D	72144	AP	1	null	null	0	0.9167	1	0.3073
TRAPPC13	72245	ES	9	7	10	0	0.9452	0.7503	0.1277
PNISR	77056	ES	2	1	3	0	0.981	0.5318	0.0973
IL20RA	77929	ES	4	3	5.1	0	0.8738	0.7229	0.1214
SOD2	78304	RI	8.2	8.1	8.3	0	0.981	0.6551	0.117
NUDT1	78608	AP	2	null	null	0	0.9786	0.6135	0.1021
POLM	79455	AA	9.1	8	9.2	0	0.9452	0.4752	0.0505
KRIT1	80429	AD	1.3:1.4:1.5	1.2	2.1	0	0.8976	1	0.1908
ZSCAN25	80706	AD	4.3	4.2	5	0	0.9048	0.4546	0.0685
SLC12A9	81010	AD	1.2	1.1	2	0	0.8952	0.8403	0.1324
EZH2	82157	ES	13	12	14.1	0	0.9738	0.388	0.0711
LETM2	83405	RI	3.3	3.2	3.4	0	0.9619	0.7145	0.1501
C8orf46	84018	AT	7	null	null	0	0.9429	0.4771	0.0864
C8orf46	84019	AT	6.2	null	null	0	0.9429	0.4771	0.0864
PEX2	84241	ES	4.2	2.2	5	0	0.9643	0.7366	0.133
FAM49B	85160	ES	5	4	6	0	0.981	0.7174	0.1182
FAM49B	85161	ES	5	3	6	0	0.9714	0.908	0.104
MROH1	85542	AT	14	null	null	0	0.981	0.7022	0.1239
MROH1	85543	AT	45	null	null	0	0.981	0.7022	0.1239
SEMA4D	86813	ES	4.2	3	5	0	0.8833	0.9128	0.1545
WNK2	86906	AA	30.1	29	30.2	0	0.8214	0.5112	0.1112
NR4A3	87062	AT	9	null	null	0	0.9762	0.4891	0.0671
NR4A3	87063	AT	6.2	null	null	0	0.9762	0.4891	0.0671
MID1	88461	AP	3.1	null	null	0	0.9357	0.8684	0.2054
SH3KBP1	88641	AP	1	null	null	0	0.981	0.8478	0.1616
SH3KBP1	88643	AP	10	null	null	0	0.981	0.7941	0.1538
TRMT2B	89626	AD	2.2:2.3	2.1	3	0	0.8095	1	0.1991
ATE1	91855	ME	8|9	7	10	0	0.9405	0.8308	0.1513
GOLT1B	92984	ME	3|4	2	5	0	0.8905	0.7528	0.1645
PDCD6	96852	ES	6.1	4	7	1	0.7976	0.7674	0.1567
EEF1D	98099	ES	6	1	7.2	1	0.9738	0.7291	0.1233
RPL13A	264941	ES	2.1:2.2	1	3	1	0.9571	0.7459	0.1296
RAB28	265743	ME	7|8	6	9	0	0.9262	0.4858	0.0599
COL1A2	1412008	ES	23:24:25:26:27:28:29:30:31:32:33:34:35:36:37:45:46:47	22	48	1	0.7952	0.6737	0.0953
